1 **Quantitative analysis and medium components optimizing for**  
2 **culturing a fastidious bacterium *Christensenella minuta***

3 Hongshi Xiao, Binghuan Liu, Jie Yong and Haiyan Zhou\*

4 College of Bioscience and Biotechnology, Hunan Agricultural University, Changsha,  
5 Hunan 410128, China

6 Correspondence: haiyanzhou1204@hotmail.com

7  
8 **Abstract**

9 *Christensenella minuta* is a heritable bacterium with controversial physiologies  
10 associating with both obesity and potential pathogenicity. Since this bacterium is  
11 fastidious to culture, it is hardly to well understand its biological feature. We develop a  
12 strategy for statistical analysis of this low abundant strain and optimize culture  
13 condition to make a significant improvement on its biomass and facilitate the researches  
14 about the metabolism and function of this bacterium. Basing on the fluorogenic  
15 quantitative technology, a quantitative approach was successfully constructed for  
16 *Christensenella minuta* by plotting Ct value from fluorescence quantitative PCR against  
17 the logarithm of concentration gradient of plasmids containing 16S rDNA of the strain.  
18 This method exhibited to have specificity on analyzing the strain biomass statistically.  
19 For improving the strain biomass, “komodo” predicted to optimize medium  
20 components and metabonomics analysis explored the catabolites addition effects on  
21 culture improvement. With the aid of Plackett-Burman and Box-Behnken in Design-  
22 Expert 8.0.6, the PB and response surface experiment were designed and analyzed from  
23 the single factor results. On the modified GAM medium, the strain concentration was

24 found increasing markedly by 10 times. The addition of some amino acids, vitamins  
25 and inorganic salts has contributions for the strain multiplication, especially L-cysteine,  
26 VB6 and NaCl. The addition of 55 mg/L of L-cysteine, 20.5 mg/L VB6 and 55 g/L  
27 NaCl into the modified GAM medium increased the biomass by 3.59 times compared  
28 to the biomass on only modified GAM medium according to the response surface  
29 experiment. Through the newly constructed method, we successfully analyzed the  
30 amount of *Christensenella minuta* and obtained a novel medium to increase biomass  
31 significantly.

32 **Keywords** *Christensenella minuta*, Fastidious bacterium, Statistical analysis,  
33 Fluorescence quantitative PCR, Medium components optimizing, Metabonomics  
34 analysis

### 35 **Importance**

36 *Christensenella minuta* is a heritable bacterium with controversial physiologies  
37 associating with both obesity and potential pathogenicity. Since this bacterium is  
38 fastidious to culture, it is hard to well understand its biological feature. We develop a  
39 strategy for statistical analysis of this low abundant strain and optimize culture  
40 condition to make a significant improvement on its biomass and facilitate the researches  
41 about the metabolism and function of this bacterium. This work combined the  
42 prediction tools and experiments to improve the medium components of *C. munita* and  
43 successfully enhance the culturing and increase biomass by more than 10-fold. From  
44 this perspective, the project throws some new ideas and also enables access to new  
45 knowledge and information in uncultured microbial resources.

## 46 INTRODUCTION

47 Microbes are the most life forms on the earth and have been applied widely in medicine,  
48 environmental protection and other fields. In fact, most microbial lineages have not  
49 been isolated in pure culture and it was estimated that only 1% of microbes can be  
50 cultured on laboratory media (1). Furthermore, it is still unknown that the abundances  
51 and viability of uncultured microbes at different levels of phylogenetic divergence from  
52 their cultured relatives. With greater phylogenetic distance correlating with higher  
53 levels of evolutionary changes, uncultured groups may have novel undiscovered  
54 functions and applications.

55 Although the culture-independent technologies on uncultured microbes expanding,  
56 such as metagenomics and metatranscriptomics, the information about the microbial  
57 diversity and distribution can be available. However, the growth requirements and  
58 physiological functions of many uncultured microorganisms remain unexplored. For  
59 clearly exploring the biological mechanism of individuals from uncultured group,  
60 developing the methods on the pure culture, qualitative and quantitative analysis are  
61 more realistic (2, 3).

62 *Christensenella minuta* (*C. minuta*) is a gram-negative gastrointestinal bacterium (4).  
63 It was discovered originally associating with obesity through an unknown biological  
64 mechanism (5). Most interestingly, the genome of *C. minuta* is highly heritable (6) and  
65 presents a valuable application on future obesity therapy (7). Nevertheless, some recent  
66 researches have demonstrated that *C. minuta* might be a potential pathogen and have  
67 high-risk for its application in the obesity therapy (8). *C. minuta* was isolated from the

68 blood of a patient with a diagnosis of acute appendicitis and this bacterium is one of  
69 suspects to cause this disease. From all present studies, the conclusion about the  
70 physiological characteristics and pathogenicity of *C. minuta* remain elusive.

71 *C. minuta* is a strictly anaerobic bacterium (4) and its coefficient of culturing  
72 difficulty is extremely high on the laboratory media. Establishing feasible methods for  
73 analyzing and culturing *C. minuta in vitro* is conducive to understand its physiological  
74 function. We developed a quantifying method using fluorescence quantitative RT-PCR  
75 to valuate microbial population; Furthermore, we combined its metabolomic  
76 background and positive growth factors to accelerate *C. minuta* growing and increase  
77 its biomass. In this paper, our work will be detailed.

## 78 **RESULTS**

79 **Specific quantitative measurement of *C. minuta* population basing on**  
80 **fluorescence quantitative PCR.** *C. minuta* is hardly to observe when inoculating on  
81 the laboratory media and we have trouble to calculate the strain population using  
82 conventional quantitative methods such as cell counting, turbidimetry. Quantifying the  
83 cellular abundance in our sample is challenging. Since in the microbial culture, there  
84 still have some other microbes except *C. minuta*, the specific method for measuring the  
85 number of *C. minuta* was our foremost requirement for assessing the bacterial growing  
86 improvement.

87 Fluorescent quantitative real-time PCR (FQ-PCR) has been used widely to quantify  
88 the number of genomic copies of microorganisms (9). For distinguishing our target  
89 microbe, the method combining specific sequence of microbial 16S rDNA with FQ-

90 PCR is promising to provide a way to quantitate our strain accurately.

91 From the public databank, 16S rDNA in *C. minuta* is a 1497 bp sequence containing  
92 one constant region and one variable region. Its constant region sequence is identified  
93 as following: ATCTCAAAAAGCCGGTCCCAGTTCGGATTGTGGGCTGCAACCC  
94 GCCCACATGAAGTCGGAGTTGCTAGTAATCGCGAATCAGCATGTCGCGGTG  
95 AATGCGTTCCCGGGCCTTGTACACACCGCCCGTCACACCACGGAAGTTGG  
96 GAGCACCCGAAGCCAGTGGCTTAACCGTAAGGAGAGAGCTGTCGAAGGTG  
97 AGATCAATGACTGGGGTGAAG. After comparing 16S rDNA sequences of three  
98 strains from *Christensenella* family, three pairs of primers were designed and sequences  
99 were listed in Table 1. To ensure the cloning is specified for *C. minuta*, the  
100 electrophoresis and FQ-PCR assessment was performed (Figure 1 and 2). The target  
101 band can be observed on *C. minuta* lanes with all primers 1, 2 and 3, but is invisible on  
102 *E. coli* lanes and other microbial lanes. As compared to prime 2 and 3, prime 1 had less  
103 false positive and smear. From the intensity of cloning and the amplification curve of  
104 fluorescence quantification PCR, primer 1 is highly specific and sensitive for cloning  
105 16S rDNA of *C. minuta*.

106 As to the quantitative measurement, the principle is the linear relationship between the  
107  $C_t$  value of each template and the logarithm of the initial copy number of the template  
108 is as following.

$$109 \quad C_t = -1/\lg(1+Ex) \times \lg X_0 + \lg N / \lg(1+Ex)$$

110 ( $X_0$  is the initial template amount;  $Ex$  is the amplification efficiency; and  $N$  is the  
111 amount of amplified product when the fluorescence amplification signal reaches the

112 threshold intensity).

113 In this equation, the initial copy number increases with  $C_t$  value getting lower. A  
114 standard curve can be made using a standard with a known initial copy number, where  
115 the abscissa represents the logarithm of the initial copy number and the ordinate  
116 represents the  $C_t$  value. Therefore, as long as  $C_t$  value of the unknown sample is  
117 obtained, the initial copy number of the sample can be calculated from the standard  
118 curve. The plasmid cloned by primer 1 from *C. minuta* was extracted and concentration  
119 was measured, then the plasmid was cloned on fluorescence quantitative PCR. The  
120 calibration curve is constructed by the plasmid concentration logarithm against  $C_t$  value  
121 (Figure 3) and will be used in subsequent studies.

122 **Predicting new culturing media with KOMODO.** Culturing microorganisms is a  
123 challenge that is critical for tapping the biotechnological potential of microbes. For  
124 normal microbes, culturing new organisms can be guided by protocols such as Bergey's  
125 Manual of Systematic Bacteriology. However, even with these guides, the culturing for  
126 uncultured microorganisms still requires a great deal of trials. A most accepted reason  
127 for their unculturability is the absence of key growth factors in artificial media (10),  
128 therefore it has a lot of space to improve the media components for culturing fastidious  
129 microbes.

130 The Known Media Database (KOMODO) is a database of microbial media with  
131 almost all DSMZ collection (11). KOMODO includes 3,335 media variants, 1,324  
132 metabolic components composing the media and 20,824 media–strain pairings. It has  
133 been an online tool that can predict optimized media that microorganisms can grow on

134 by inputting microbial 16S rDNA sequence or an NCBI taxon ID. With the prediction  
135 of KOMODO, the options "non-strict aerobic", "inorganic salt in the medium" and  
136 "evolution distance is less than 0.04" were defined and 16S rDNA sequence of *C.*  
137 *minuta* (sequence similarity > 85%) was introduced to predict media formula that has  
138 improvement on bacterial growing. According to the KOMODO score, three media  
139 were recommended including caldicoprobacter medium (score 400), modified GAM  
140 medium (score 62.9) and EG medium (score 35.6). *C. minuta* was inoculated on three  
141 recommended media to confirm the growth-promoting effect experimentally. The  
142 results in Figure 4 have shown that modified GAM medium is the optimal medium for  
143 *C. minuta* and the composition of the medium is detailed in Table 2. On the modified  
144 GAM medium, the cell amount of *C. minuta* dramatically increased by 16-fold  
145 compared to that on basic medium.

146 **Medium optimizing basing on metabolomics analysis.** In recent years, some  
147 culturing efforts, particularly for difficult-to-culture organisms, have begun to include  
148 genome and pathway analysis (12,13), as well as high-throughput technologies for  
149 determining microbial nutrient needs (14).

150 KEGG (Kyoto Encyclopedia of Genes and Genomes) is a collection of databases by  
151 annotating the reads to known functional gene (15). KEGG is utilized for bioinformatics  
152 research including data analysis in genomics, metagenomics, metabolomics and other  
153 omics studies. This database provides a comprehensive understanding of the  
154 community structure at a high resolution and potential metabolism pathway associated  
155 with microbial community.

156 After the genome sequencing of *C. minuta* was completed, the KEGG map of the  
157 carbon metabolism pathway was analyzed and some characteristics *C. minuta*  
158 metabolism have been found. Figure 5a shows that in furfural metabolism, the direct  
159 pathway of xanthine to amino acids (such as glycine and serine) was substituted by a  
160 more complicated path, which may result to the difficult growth of *C. minuta*.  
161 Supplementing the medium with the appropriate amount of glycine and serine may  
162 increase the culture abundance of *C. minuta*. In the pyrimidine metabolism of figure 5b,  
163 it can be seen that UDP, DTP and CTP are the starting materials for the reaction, but the  
164 key enzyme (3.6.1.8 ATP pyrophosphatase) lacks. Figure 5c showed the cysteine  
165 metabolism of *C. minuta*. In these pathways, the lack of enzymes that converts cysteine  
166 and cystine reminded us of supplying cystine to enhance *C. minuta* biomass in culture.  
167 Figure 5d shows that the lack of enzymes for the conversion of imidazole-4-acetic acid  
168 to aspartic acid in the histone metabolism may also be responsible for the low  
169 abundance of culture of *C. minuta*. The product aspartic acid may increase the culture  
170 abundance of *C. minuta*. In Figure 5e, the amino acid and nucleotide sugar metabolic  
171 pathways of *C. minuta* lack the enzyme (UDP-glucuronate 5'-epimerase) for the  
172 conversion of UDP-GlcA (glucuronide) to UDP-L-IdoA. Figure 5f shows that in the  
173 metabolism of *C. minuta*, VB12 is an important intermediate in the reaction. There are  
174 two synthetic pathways, but none of the related enzymes 1.16.1.6 (cyanocobalamin  
175 reductase) or 1.16.1.4 (cob(II) alamin reductase) . If VB12 is added directly to the  
176 culture medium, it is expected to improve the culturability of *C. minuta*. The predicted  
177 results in Figure 5g show that *C. minuta* lacks an important pathway in the VB6



178 metabolism of pyridoxine, isopyridoxal, hydroxymethyl succinate semialdehyde,  
179 which lacks key enzymes 99.9 (pyridoxine 5-dehydrogenase), 1.14.12.5 (5-pyridoxate  
180 dioxygenase), 3.5.1.66 (2-(hydroxymethyl) -3-(acetamidomethylene) succinate  
181 hydrolase), the deletion of this pathway gene may also lead to the difficulty of *C. minuta*  
182 in culturing, if the key metabolites in the above pathway are added to the medium, the  
183 culture abundance may be increased.

184 According to the metabolic pathway map analyzed above, serine and glycine were  
185 selected to verify the metabolism of furfural, cystine and cysteine to verify cysteine  
186 metabolism, aspartic acid to verify histidine metabolism, UMP, CMP to verify  
187 pyrimidine Metabolism, VB12 verifies VB12 metabolism, and VB6 verifies VB6  
188 metabolism. Refer to the amino acid concentration in DMEM medium (L-serine 42.00  
189 mg / L, glycine 30.00 mg / L, L-cystine 63.00 mg / L, L-HCl cysteine 80.00 mg / L, L-  
190 winter The amino acid was added at 16.00 mg/L, and the VB6 (pyridoxine  
191 hydrochloride) in this formulation was 4.00 mg/L. Vitamins were added with reference  
192 to human serum VB12 concentration (70 to 590 pmol/L) and VB6 (14.6 to 72.9 nmol/L).  
193 UMP and CMP were added with reference to yeast synthesis UMP concentration (14.3  
194 g/L). As shown in Table 3, after adding each test substance to the medium, the growth  
195 of *C. minuta* showed a certain promotion effect (Multiples > 1).

196 Once the basic culture conditions were determined by single factor experiments, PB  
197 experiments were performed to determine which factor concentration changes had a  
198 significant effect on the multiples of *C. minuta*. The results are shown in Table 4 that  
199 the three most important factors among the many influencing factors are L- Cysteine,

200 VB6 and NaCl, the corresponding P-value values were 0.0001, 0.0006 and 0.0036,  
201 respectively, indicating a significant difference.

202 The response surface test was carried out with concentrations and combinations of  
203 three factors with significant differences of NaCl, L-cysteine and VB6. The results  
204 (Table 5) showed that the addition of 55 mg/L of L-cysteine, 20.5 mg/L VB6 and 55  
205 g/L NaCl into the modified GAM medium were optimized and improved the growth of  
206 *C. minuta*, which increased the biomass of strains by 3.59 times, with significant  
207 differences.

208 The significance of the above factors is analyzed by the contour and 3D graphs of  
209 the AB, AC, and BC interaction results. The concentric center of the contour (the red  
210 dot in the graph) falls within the common values of the factors AB, AC, and BC (Fig.  
211 6). Therefore, the maximum value of the dependent variable was obtained in the range  
212 of the common concentration, indicating that the optimal composition of the *C. minuta*  
213 medium was optimized in this experiment.

## 214 **CONCLUSION**

215 At present, the microorganisms that can cultivate in the laboratory account for only 1%  
216 of the microbial species, which means most of the microorganisms in nature cannot be  
217 cultured in the laboratory. Since that, most microbes cannot be scientifically studied.  
218 Although the development of metagenomics, transcriptomes, etc., has enabled  
219 researchers to conduct taxonomic and gene-based informatics analysis of difficult-to-  
220 cultivate or non-cultivable microorganisms, it is still necessary to conduct functional  
221 research and resource development for a specific microbial individual. In the

222 development of microbial culture methodology, scientists can only conduct in-depth  
223 research on target microbial resources on the basis of cultivable conditions.

224 In this work, we combined the prediction tools and experiments to improve the media  
225 components of *C. minuta* and successfully enhance the culturing and increase biomass  
226 by more than 10-fold. From this perspective, the project throws some new ideas and  
227 also enables access to new knowledge and information in uncultured microbial  
228 resources.

229 In addition, microbes are the source of important biosynthetic resources.  
230 Uncultivated microorganisms not only contain a large number of unexploited material  
231 resources in terms of quantity and species, but these microbial populations that are not  
232 recognized by humans are a treasure house. Providing new functional molecules for  
233 biological applications, and has great potential for development in new drugs and new  
234 enzymes.

## 235 **MATERIALS AND METHODS**

236 ***Christensenella minuta* and its basic culture.** *C. minuta* was obtained from feces  
237 sample. The single colony was screened and identified with 16S rRNA. The strain was  
238 basically cultured on Gifu anaerobic medium (Nissui Pharmaceutical). Each inoculated  
239 sample was incubated at 37°C for 3 days in an anaerobic glovebox (Coy Laboratory  
240 Products), which contained 88% nitrogen, 7% hydrogen and 5% carbon dioxide.

241 **Cloning of specific fragments in *C. minuta* and PCR product transforming.** The  
242 gene of *C. minuta* was extracted with TIANGEN MiniElute DNA Kit (DP316) and 16S  
243 rDNA fragment was cloned with the template of total DNA by specific designed primers.

244 PCR procedure was followed as the introduction in QIAGEN PCR kit (VI102). PCR  
245 reaction is 95°C 5 min; 95°C 30 s, 60°C 30 s, 72°C 30 s, 30 cycles; 72°C 10 min.  
246 pClone007 Blunt Simple Vector Kit was used for the gene linking to make recombinant  
247 plasmids. The recombinants were transformed into *E. coli* competent and the procedure  
248 was shown in Figure 7.

249 **Fluorescence quantitative PCR and calibration curve construction.** All  
250 recombinants were extracted and concentration was measured. A 10-fold gradient  
251 dilution of the positive plasmid was used to construct a calibration curve against  $C_t$   
252 value from the fluorescence quantitative PCR. Use 2×T5 Fast qPCR Mix(SYBRGreenI)  
253 to perform qPCR and the reaction system configuration is 2×T5 Fast qPCR Mix 10 μL,  
254 upstream and downstream primer 0.4 μL respectively, 50×ROX reference dye 0.4 μL,  
255 DNA sample 2.0 μL and 6.8 sterile water. PCR reaction procedure is 95°C 30 s; 95°C  
256 15 s, 61°C 60 s, 40 cycles. Fluorescence was detected in each cycle.

257 **KOMODO prediction and metabolite analysis.** On Komodo page ([http://delta-](http://delta-tomcat-vm.cs.tau.ac.il:40678/Komodo/growrec.htm)  
258 [tomcat-vm.cs.tau.ac.il:40678/Komodo/growrec.htm](http://delta-tomcat-vm.cs.tau.ac.il:40678/Komodo/growrec.htm)), the optimal media were  
259 predicted for *C. minuta*. The conditions were limited: Is organism Aerobic  
260 (Yes/No/Unknown): No; Does Organism grow in Salty Media (Yes/No/Unknown):  
261 Yes; Maximal phylogenetic distance (range:0.0 - 1.0, default:0.04): default. 16S rRNA  
262 data of *C. minuta* was inputted and blast 'Identities' Low Limit %: 85%. *C. minuta*  
263 was inoculated on predicted media from KOMODO database. After culturing for 7  
264 days, the samples were determined by fqPCR to evaluate the optimal medium.

265 The metabolite analysis was performed with KEGG ( <https://david.ncifcrf.gov>

266 [/home.jsp](#); ) combining genomics data of *C. minuta* from NCBI (<https://www.ncbi.nlm.nih.gov/>). Choose “GO ONTOLOGY and PATHWAY” and the prediction results were  
267 obtained. *C. minuta* was inoculated on modified GAM media supplying with  
268 metabolites predicted from KEGG. After culturing for 7 days, the samples were  
269 determined by fqPCR to evaluate the optimal medium.  
270

### 271 **Acknowledgements**

272 This research was supported financially by Hunan Provincial Natural Science  
273 Foundation of China (2016JJ4038) and Double first-class construction project of Hunan  
274 Agricultural University (SYL201802002).

### 275 **Conflict of interest**

276 The authors declare that they have no conflict of interest.

### 277 **Reference**

- 278 1. Hofer U. The majority is uncultured. 2018. *Nat Rev Microbiol.* 16:716-717.
- 279 2. Vilanova C, Porcar M. 2016. Are multi-omics enough. *Nat Microbiol.* 1(8):16101.
- 280 3. Eric J. Stewart. 2012. Growing Unculturable Bacteria. *J Bacteriol.* 194: 4151–4160.
- 281 4. Alonso BL, Irigoyen von Sierakowski A, Sáez Nieto JA, Rosel AB. 2017. First report  
282 of human infection by *Christensenella minuta*, a gram-negative, strickly anaerobic  
283 rod that inhabits the human intestine. *Anaerobe.* 44:124-125.
- 284 5. Morotomi M, Nagai F, Watanabe Y. 2012. Description of *Christensenella minuta* gen.  
285 nov., sp. nov., isolated from human faeces, which forms a distinct branch in the order  
286 Clostridiales, and proposal of Christensenellaceae fam. nov. *Int J Syst Evol Microbiol.*  
287 62:144-149.

- 288 6. Rosa BA, Hallsworth-Pepin K, Martin J, Wollam A, Mitreva M. 2017. Genome  
289 Sequence of *Christensenella minuta* DSM 22607T. *Genome Announc.* 5: e01451-16.
- 290 7. Yang Y, Gu H, Sun Q, Wang J. 2018. Effects of *Christensenella minuta*  
291 lipopolysaccharide on RAW 264.7 macrophages activation. *Microb Pathog.* 125:  
292 411-417.
- 293 8. Petrov VA, Saltykova IV, Zhukova IA, Alifirova VM, Zhukova NG, Dorofeeva YB,  
294 Tyakht AV, Kovarsky BA, Alekseev DG, Kostryukova ES, Mironova YS,  
295 Izhboldina OP, Nikitina MA, Perevozchikova TV, Fait EA, Babenko VV,  
296 Vakhitova MT, Govorun VM, Sazonov AE. 2017. Analysis of gut microbiota in  
297 patients with Parkinson's disease. *B Exp Biol Med.* 162: 734–737.
- 298 9. Gurukumar KR, Priyadarshini D, Patil JA, Bhagat A, Singh A, Shah PS, Cecilia D.  
299 2009. Development of real time PCR for detection and quantitation of Dengue  
300 Viruses. *Virol J.* 6:10.
- 301 10. Strandwitz P, Kim KH, Terekhova D, Liu JK, Sharma A, Levering J, McDonald D,  
302 Dietrich D, Ramadhar TR, Lekbua A, Mroue N, Liston C, Stewart EJ, Dubin MJ,  
303 Zengler K, Knight R, Gilbert JA, Clardy J, Lewis K. 2019. GABA-modulating  
304 bacteria of the human gut microbiota. *Nat Microbiol.* 4:396-403.
- 305 11. Oberhardt MA, Zarecki R, Gronow S, Lang E, Klenk HP, Gophna U, Ruppin E.  
306 2015. Harnessing the landscape of microbial culture media to predict new organism-  
307 media pairings. *Nat Commun.* 6: 8493.
- 308 12. Baart GJ, Zomer B, de Haan A, van der Pol LA, Beuvery EC, Tramper J, Martens  
309 DE. 2007 Modeling *Neisseria meningitidis* metabolism: from genome to metabolic

310 fluxes. *Genome Biol.* 8: R136.

311 13. Carini P, Steindler L, Beszteri S, Giovannoni SJ. 2013. Nutrient requirements for  
312 growth of the extreme oligotroph 'Candidatus Pelagibacter ubique' HTCC1062 on a  
313 defined medium. *ISME J.* 7: 592–602.

314 14. Omsland A, Cockrell DC, Howe D, Fischer ER, Virtaneva K, Sturdevant DE,  
315 Porcella SF, Heinzen RA. 2009. Host cell-free growth of the Q fever bacterium  
316 *Coxiella burnetii*. *Proc Natl Acad Sci USA.* 106: 4430–4434.

317 15. Kanehisa M, Araki M, Goto S, Hattori M, Hirakawa M, Itoh M, Katayama T,  
318 Kawashima S, Okuda S, Tokimatsu T, Yamanishi Y. 2008. KEGG for linking  
319 genomes to life and the environment. *Nucleic Acids Res.* 36: D480–D484.

320

321 Table 1 Sequence of specific primers for cloning the constant region in *Christensenella*  
322 *minuta* 16S rDNA

| Primer | Sequence                                               |
|--------|--------------------------------------------------------|
| 1      | 5'-AGTCGAACGAGGTTGCCC-3'<br>5'-ATGCGTTTCGTGGTCTCAT-3'  |
| 2      | 5'-AGCGAACCCGTAAGGGGA-3'<br>5'-CACTGGCTTCGGGTGCTC-3'   |
| 3      | 5'-TATTGAGGCGGATGTTGACG-3'<br>5'-CTGGGGATACCGGCTTTG-3' |

323

324

325 Table 2 The composition of modified GAM medium (pH 7.2)

| Name                      | Concentration (g/L) | Name                           | Concentration (g/L) |
|---------------------------|---------------------|--------------------------------|---------------------|
| peptone                   | 15.0                | casein Tryptone                | 10.0                |
| soytone                   | 3.0                 | potassium dihydrogen phosphate | 2.5                 |
| sodium chloride           | 3.0                 | soluble starch                 | 0.3                 |
| L- cysteine               | 0.3                 | sodium thioglycolate           | 0.15                |
| beef Liver extract Powder | 1.2                 | glucose                        | 3.0                 |
| yeast extract             | 5.0                 | beef extract                   | 2.0                 |
| digestive serum powder    | 13.5                |                                |                     |

326 note: 60.0 g of modified GAM medium was dissolved in 1 L sterile water, autoclaved for 20 min.  
 327 Cooling down to RT and then add sterilized 1 ml vitamin K1 solution (0.1%), 2.5 g hemin, 70 ml  
 328 defibrotic rabbit blood, 100 mg kanamycin, 100 mg neomycin, 1mg vancomycin, vortex and store.  
 329  
 330  
 331  
 332

333 Table 3 Effects of each test substance on the proliferation of *Christensenella minuta*

| Test substance                              | Conc (mg/L) | Multiples | Conc (mg/L) | Multiples | Conc (mg/L) | Multiples |
|---------------------------------------------|-------------|-----------|-------------|-----------|-------------|-----------|
| L-serine                                    | 100         | 1.75      | 40          | 1.65      | 10          | 1.79      |
| L-glycine                                   | 100         | 1.29      | 30          | 1.75      | 10          | 1.78      |
| L-cystine                                   | 100         | 1.79      | 60          | 1.45      | 10          | 1.11      |
| L-cystine                                   | 100         | 1.03      | 80          | 1.87      | 10          | 1.64      |
| L-aspartate                                 | 100         | 1.67      | 20          | 1.52      | 10          | 1.34      |
| 5-uridine monophosphate disodium salt (UMP) | -           |           | 10000       | 1.35      | 1000        | 1.24      |
| Cytidine-5-disodium phosphate (CMP)         | -           |           | 10000       | 1.67      | 1000        | 1.56      |
| Pyridoxine hydrochloride (VB6)              | 40          | 0.87      | 4           | 1.73      | 1           | 1.66      |



|                  |    |      |   |      |   |      |
|------------------|----|------|---|------|---|------|
| Cobalamin (VB12) | 40 | 0.46 | 4 | 1.38 | 1 | 1.59 |
|------------------|----|------|---|------|---|------|

334  
335  
336  
337  
338  
339  
340  
341  
342  
343  
344  
345  
346  
347  
348  
349  
350  
351  
352  
353  
354

355 Table 4 Analysis of variance of selected factors

| Source      | Sum of Squares | df | F Value | p-value | Prob > F    |
|-------------|----------------|----|---------|---------|-------------|
| L-serine    | 3.234E-003     | 1  | 19.91   | 0.0467  |             |
| L-glycine   | 4.294E-003     | 1  | 26.44   | 0.0358  |             |
| L-cystine   | 4.840E-003     | 1  | 29.80   | 0.0320  |             |
| L-cystine   | 0.28           | 1  | 1738.98 | 0.0006  | significant |
| L-aspartate | 3.710E-003     | 1  | 22.84   | 0.0411  |             |
| UMP         | 0.023          | 1  | 139.27  | 0.0071  |             |
| CMP         | 0.014          | 1  | 88.37   | 0.0111  |             |
| VB6         | 1.20           | 1  | 7366.10 | 0.0001  | significant |

---

|        |       |   |        |        |             |
|--------|-------|---|--------|--------|-------------|
| L-NaCl | 0.045 | 1 | 277.18 | 0.0036 | significant |
|--------|-------|---|--------|--------|-------------|

---

356  
357  
358  
359  
360  
361  
362  
363  
364  
365  
366  
367  
368  
369  
370  
371  
372  
373  
374  
375  
376  
377

378 Table 5 Response surface experiment result

---

| <b>Run</b> | <b>Factor 1<br/>L-cystine<br/>mg/L</b> | <b>Factor 2<br/>VB6<br/>mg/L</b> | <b>Factor 3<br/>NaCl<br/>g/L</b> | <b>Multiples</b> |
|------------|----------------------------------------|----------------------------------|----------------------------------|------------------|
| 1          | 10.00                                  | 20.50                            | 10.00                            | 3.15             |
| 2          | 55.00                                  | 20.50                            | 55.00                            | 3.53             |
| 3          | 55.00                                  | 20.50                            | 55.00                            | 3.54             |
| 4          | 100.00                                 | 20.50                            | 100.00                           | 3.38             |
| 5          | 10.00                                  | 40.00                            | 100.00                           | 3.21             |
| 6          | 55.00                                  | 1.00                             | 10.00                            | 3.23             |
| 7          | 100.00                                 | 20.50                            | 10.00                            | 3.42             |
| 8          | 55.00                                  | 20.50                            | 55.00                            | 3.59             |
| 9          | 10.00                                  | 20.50                            | 100.00                           | 3.25             |
| 10         | 55.00                                  | 1.00                             | 100.00                           | 3.18             |

---

---

|    |        |       |        |      |
|----|--------|-------|--------|------|
| 11 | 100.00 | 40.00 | 55.00  | 3.39 |
| 12 | 55.00  | 20.50 | 55.00  | 3.56 |
| 13 | 100.00 | 1.00  | 55.00  | 3.3  |
| 14 | 55.00  | 40.00 | 100.00 | 3.42 |
| 15 | 10.00  | 1.00  | 55.00  | 3.08 |
| 16 | 55.00  | 40.00 | 10.00  | 3.43 |
| 17 | 55.00  | 20.50 | 55.00  | 3.57 |

---

379  
380  
381  
382  
383  
384  
385  
386  
387  
388  
389  
390

391 Figure legends:

392 **Fig. 1 a** Electrophoretic of PCR products from three pairs of specific primers in  
393 different strains. **a** 1~12: Normal PCR reaction; 14~25: Fluorescence quantitative PCR  
394 reaction; 13: marker. 1~3 and 14~15: *C. minuta*, primers are 1, 2 and 3; 4~6 and 17~19:  
395 *E. coli*, primers are 1, 2 and 3; 7~9 and 20~22: yeast, The primers were 1, 2 and 3; 10-  
396 12 and 23-25: soil samples, and the primers were 1, 2 and 3. **b** The amplification of  
397 qPCR by primer1. The curve is from *C. minuta*; The straight lines include negative  
398 control (ddH<sub>2</sub>O); *E. coli* DH5 $\alpha$ ; *Agrobacterium* EHA105; *Peptostreptococcus*  
399 *anaerobius*; *Anaerovorax odorimutana*; *Bacillus subtilis*.

400 **Fig. 2** Sensitivity test of FQ-PCR measurement. **a**. The amplification curve of qPCR

401 for *C. minuta* DNA, from left to right: concentration of *C. minuta* DNA is from  
402  $5.58 \times 10^{10}$  copies/ $\mu\text{L}$  to  $5.58 \times 10^4$  copies/ $\mu\text{L}$ . b. Electrophoretic of *C. minuta* DNA, from  
403 left to right: DNA marker, *C. minuta* DNA and concentration from  $5.58 \times 10^{10}$  copies/ $\mu\text{L}$   
404 to  $5.58 \times 10^4$  copies/ $\mu\text{L}$ .

405 **Fig. 3** Calibration curve of plasmid concentration logarithm against *Ct* value

406 **Fig. 4** The biomass of *C. minuta* growing on three KOMODO recommended media.

407 **Fig. 5** Metabolome map of *Christensenella minuta*

408 **Fig. 6** Contour and 3D plots of significant results for AB, AC, and BC interactions

409 **Fig. 7** The map of pClone007 Blunt Simple Vector and its link with 16S rDNA of *C.*  
410 *minuta*.

411

412

413

**a**

1 2 3 4 5 6 7 8 9 10 11 12 13 14 15 16 17 18 19 20 21 22 23 24 25

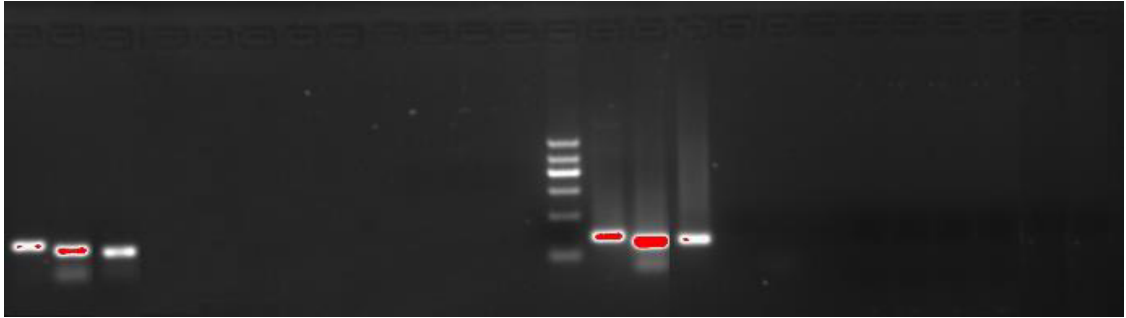

**b**

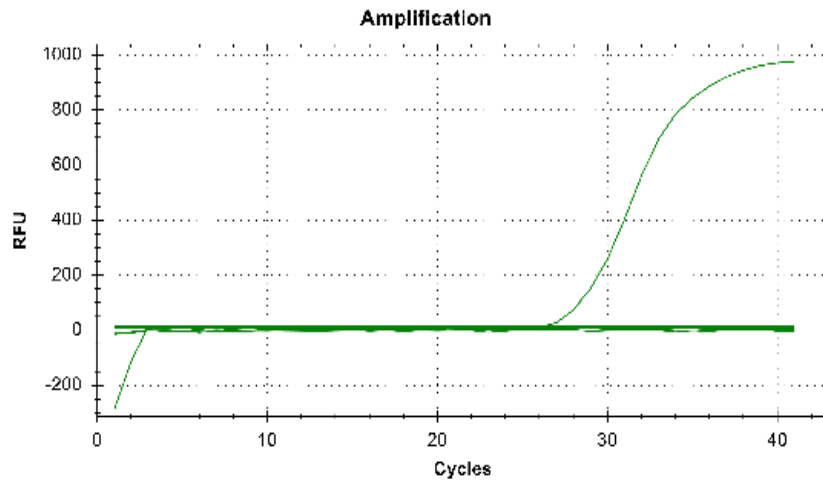

**Fig. 1**

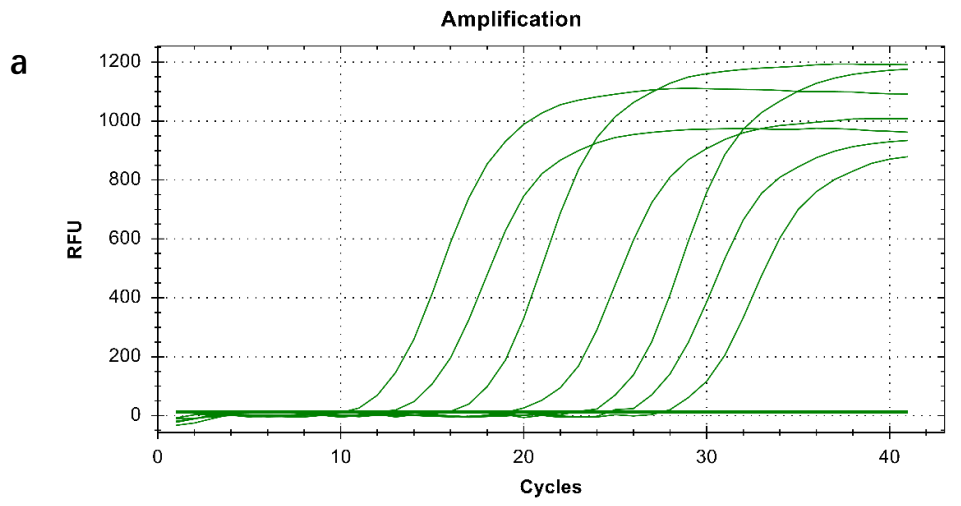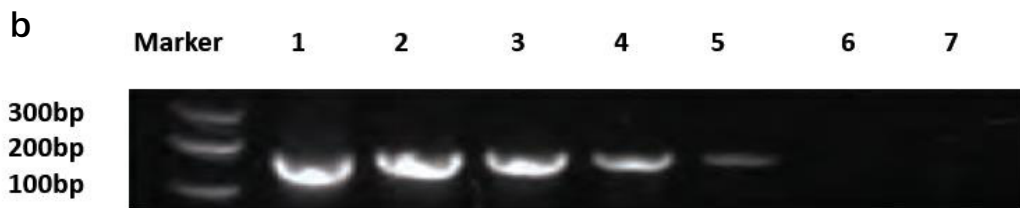

**Fig. 2**

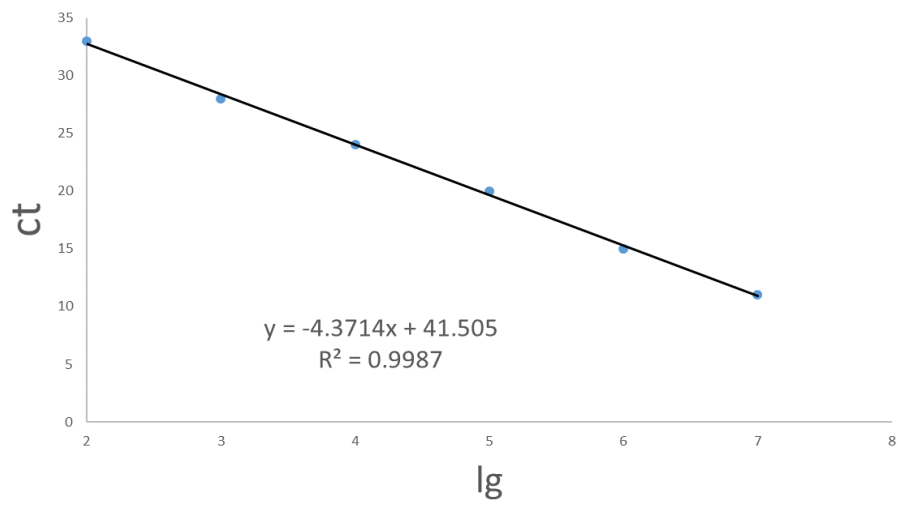

**Fig. 3**

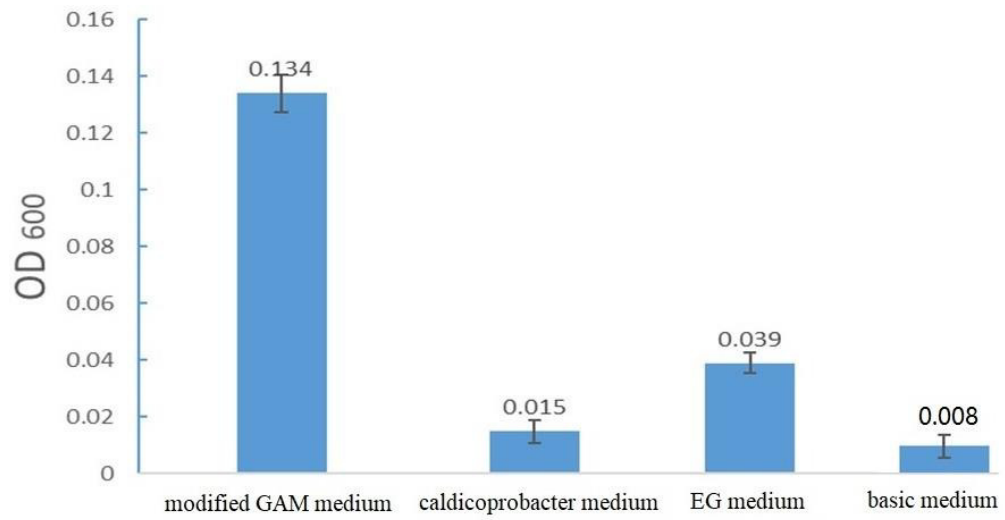

**Fig. 4**

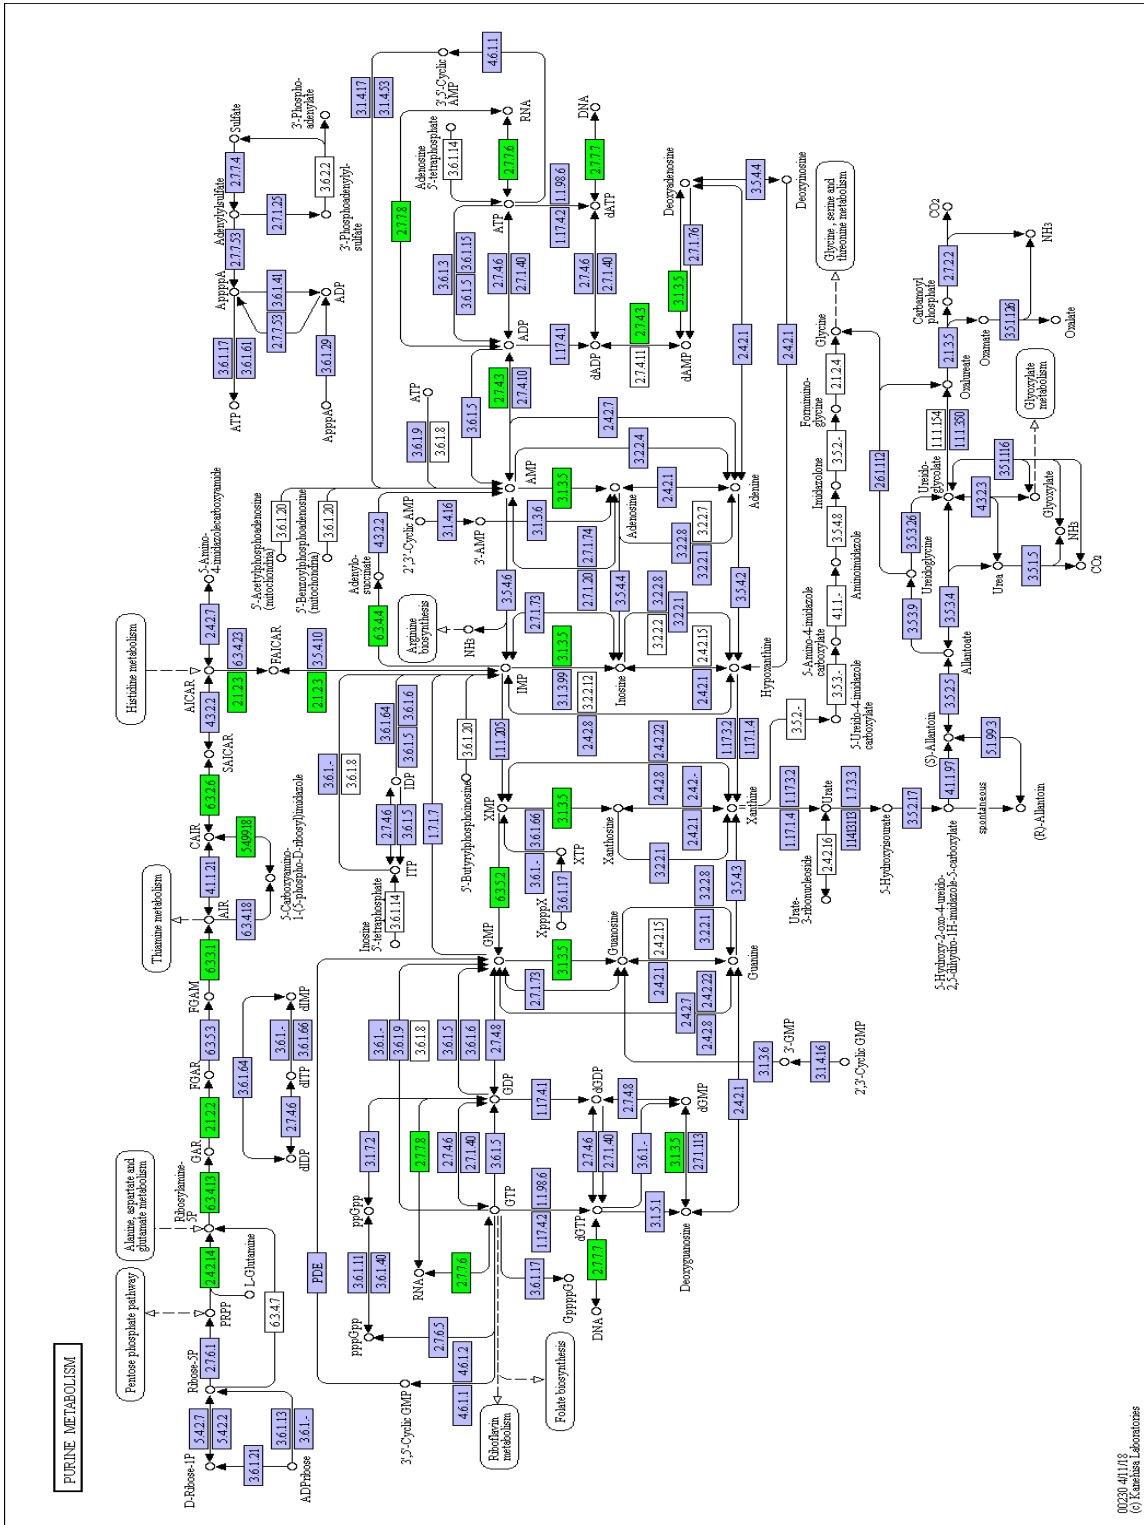

a Furfural metabolism

Fig. 5a





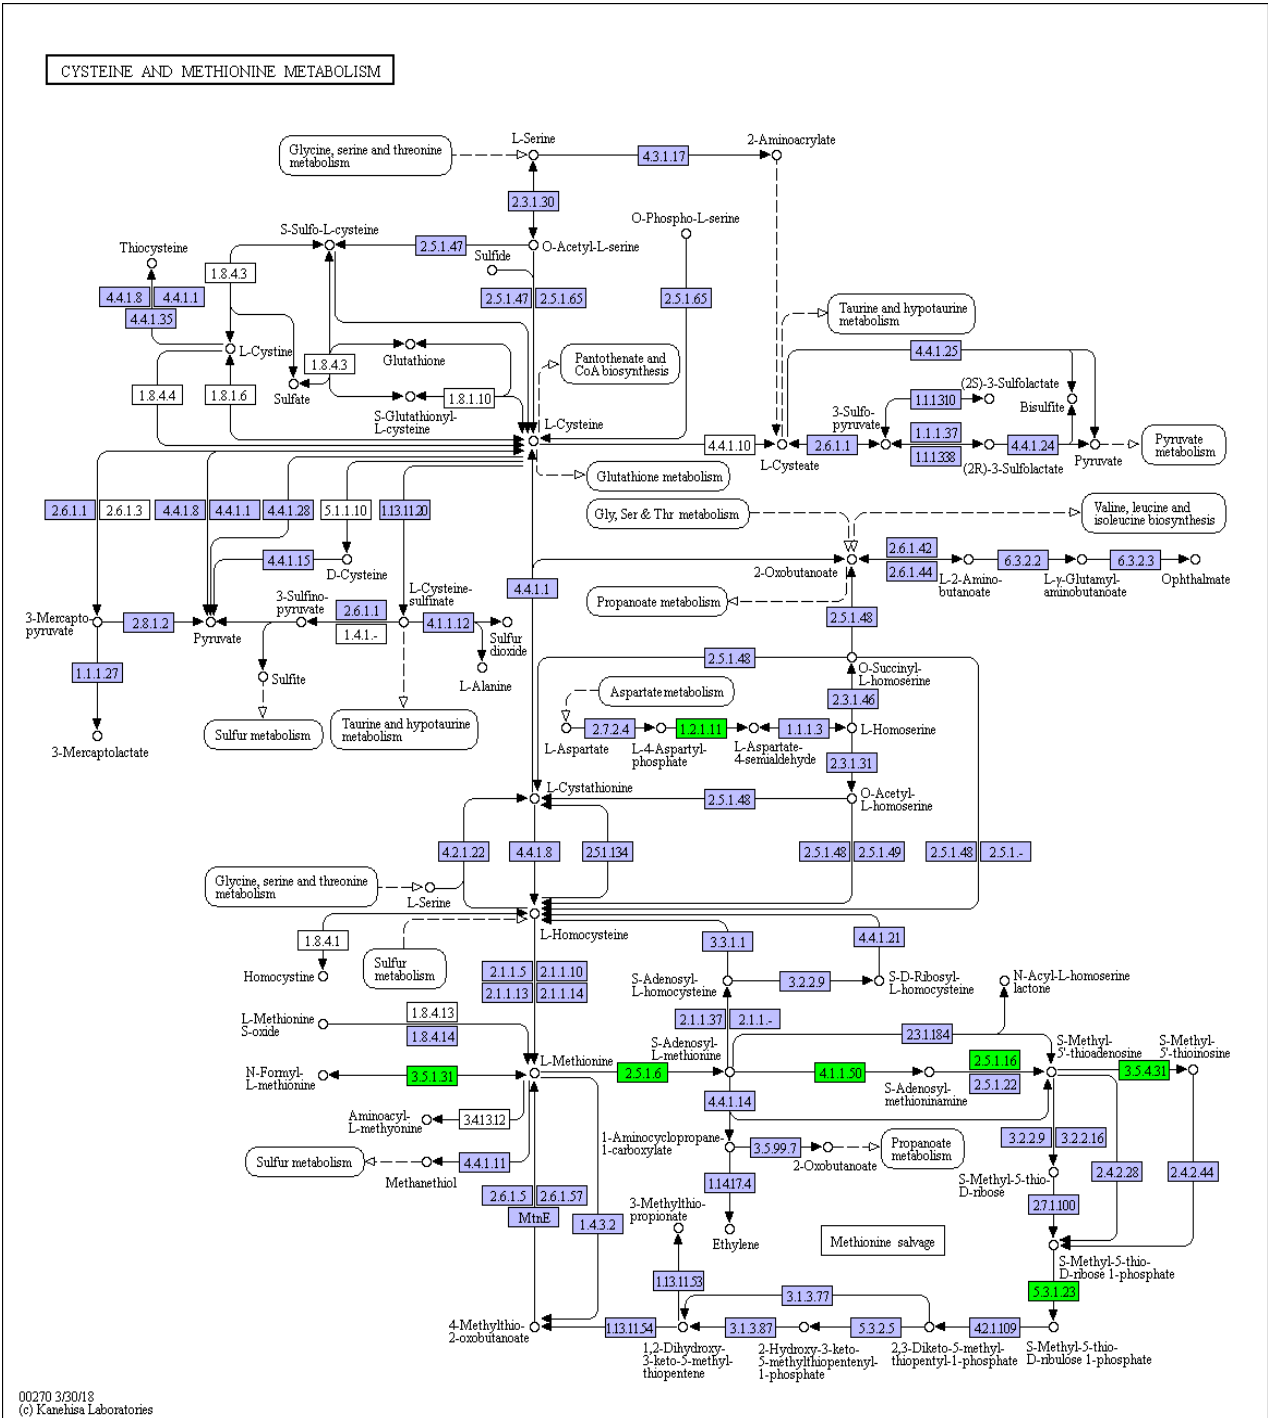

**Fig. 5c**



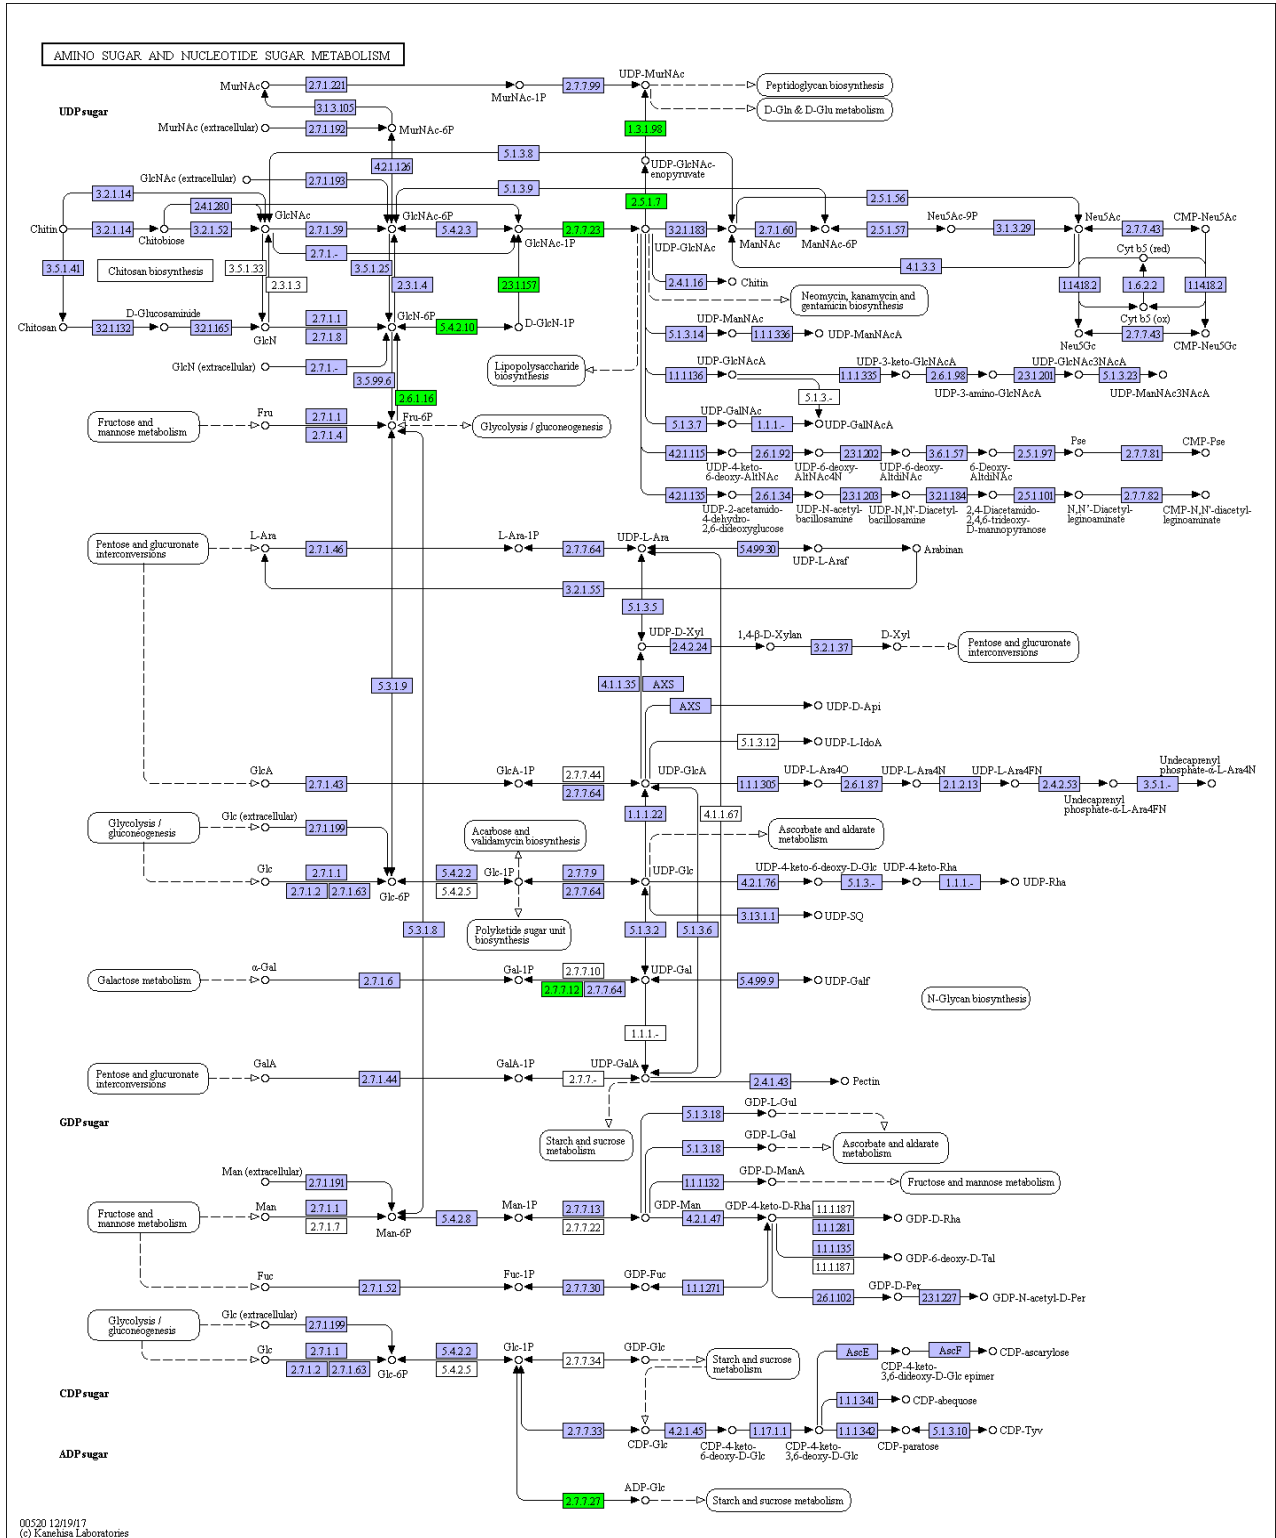

**Fig. 5e**

PORPHYRIN AND CHLOROPHYLL METABOLISM

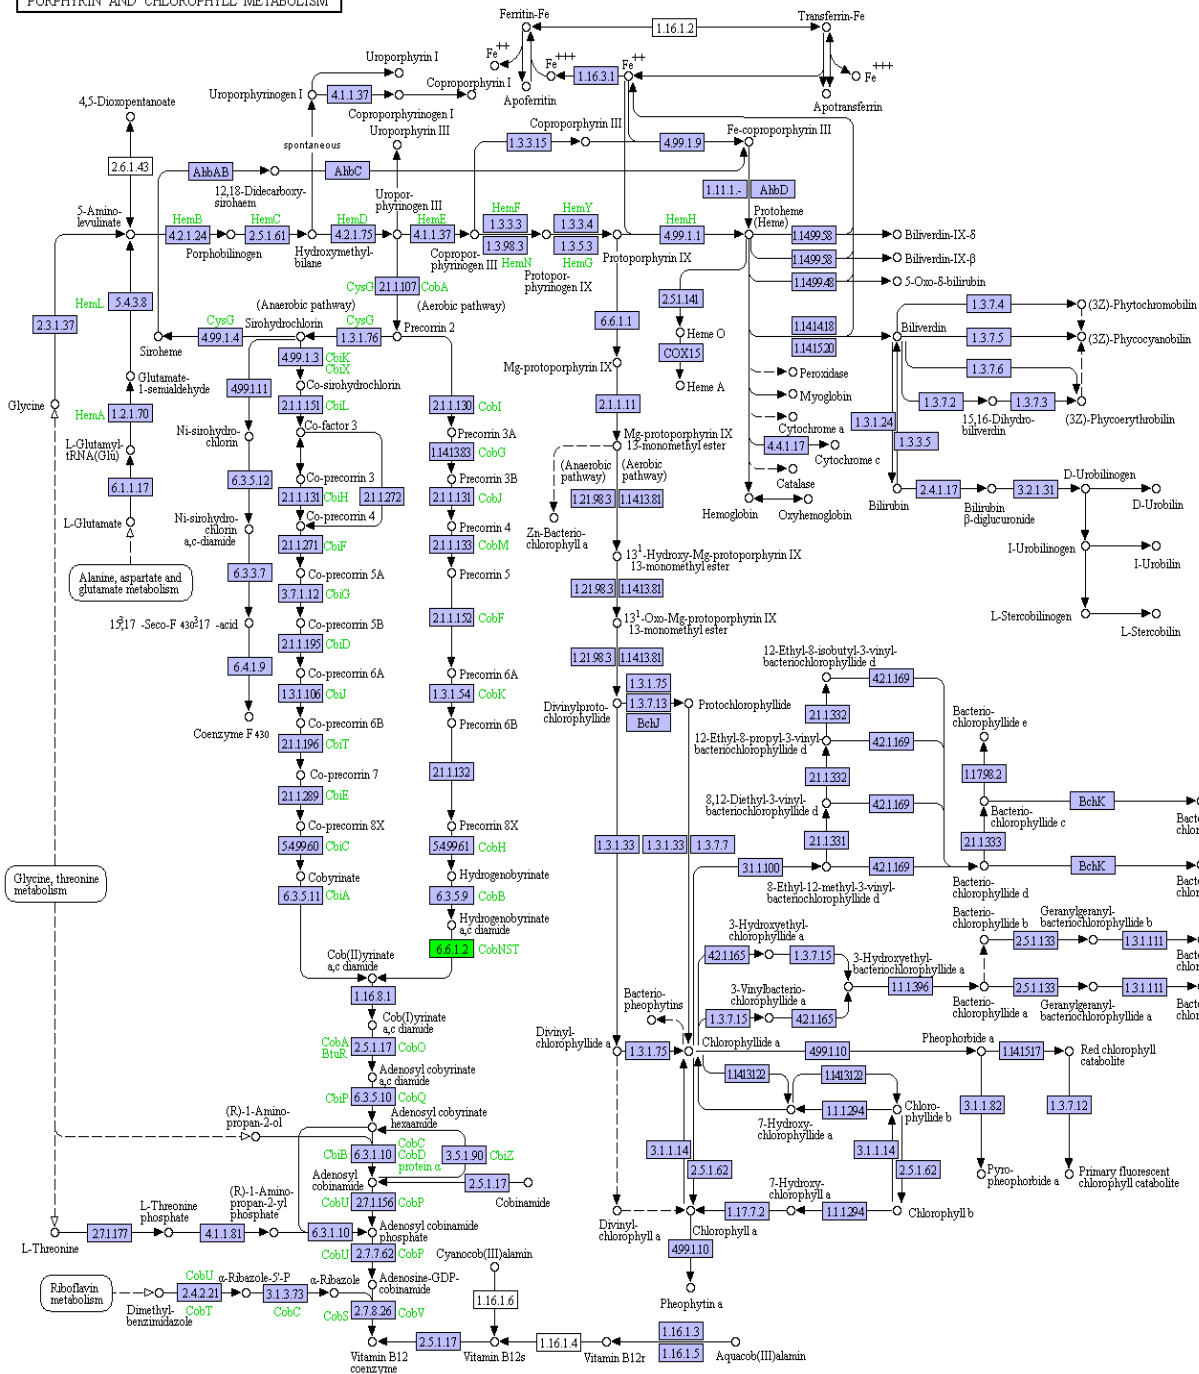

00860 S1018  
 (c) Kanehisa Laboratories

f VB12 metabolism

Fig. 5f

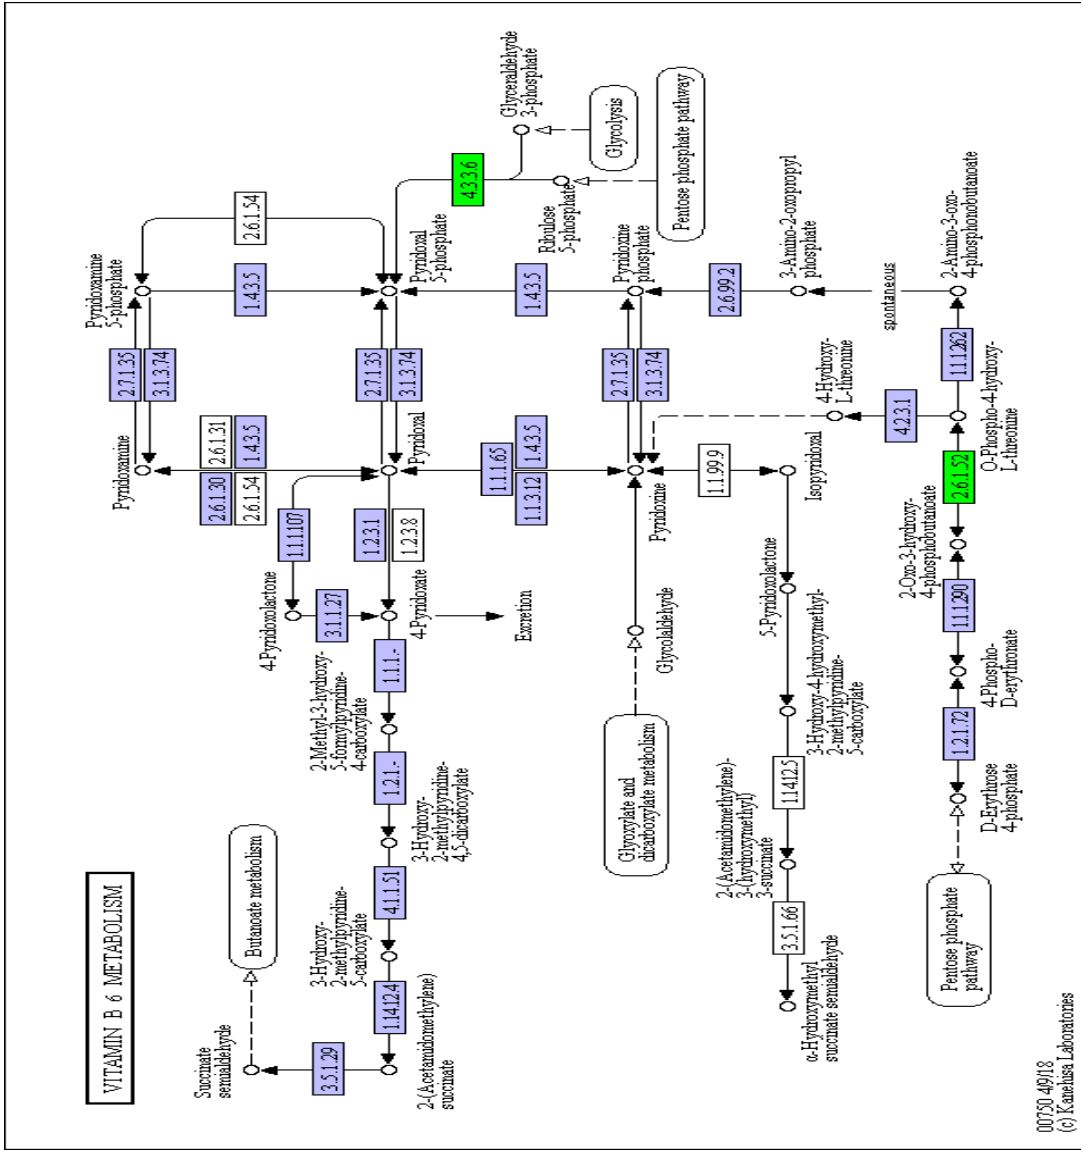

00730 4/9/18  
 (c) Kanehisa Laboratories

g VB6 metabolism

Fig. 5g

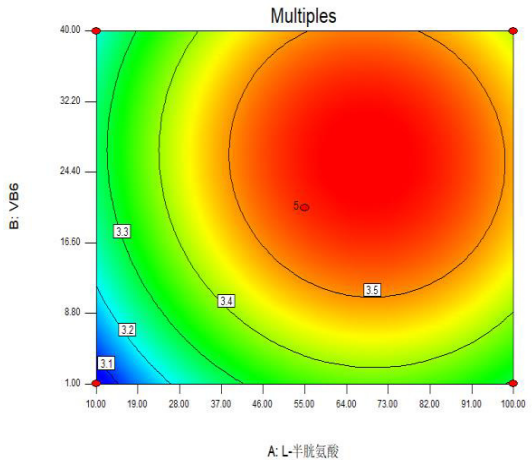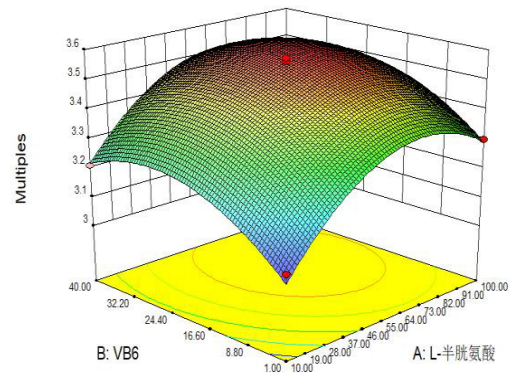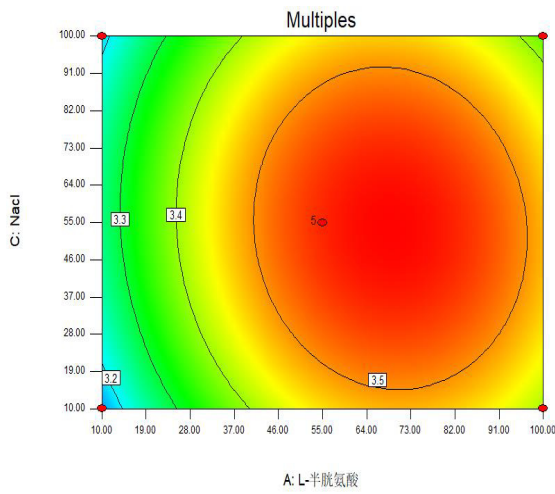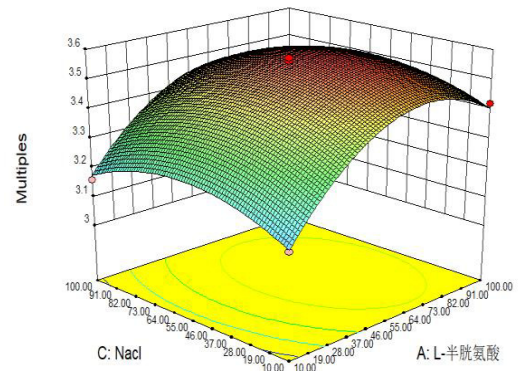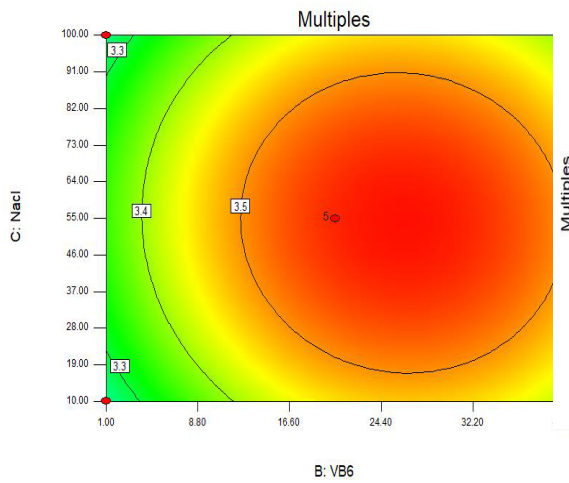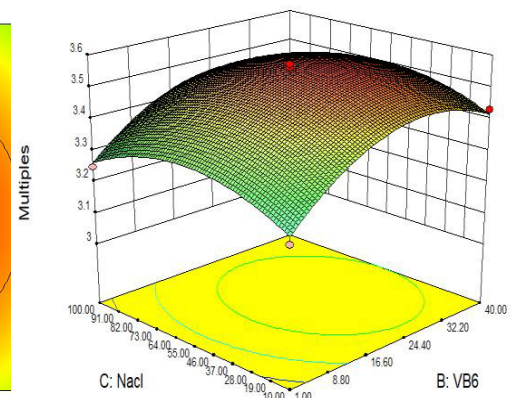

Fig. 6

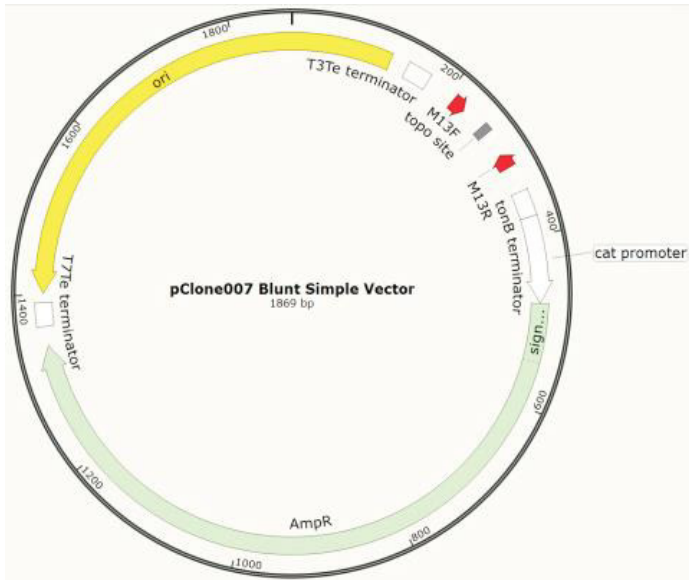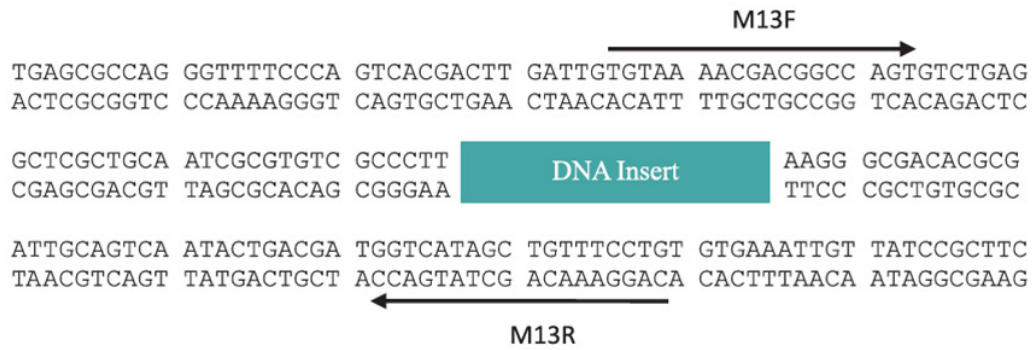

**Fig. 7**
